# Supplementary material for: Catalysis of a Bis-Caffeine Palladium(II) NHC-Pincer Complex
Source: MDPI journal article supplement (doi:10.3390/inorganics11040164), 2023-04-13
Supplement: s1 [file s1]

## Supporting Information

# Catalysis of a Bis-Caffeine Palladium(II) NHC-Pincer Complex

Oliver Bysewski <sup>1,2</sup>, Andreas Winter <sup>1,2</sup> and Ulrich S. Schubert <sup>1,2,\*</sup>

<sup>1</sup> Laboratory of Organic and Macromolecular Chemistry (IOMC), Friedrich Schiller University Jena, Humboldt Str. 10, 07743 Jena, Germany;  
oliver.alexander.bysewski@uni-jena.de (O.B.); andreas.winter@uni-jena.de (A.W.)

<sup>2</sup> Center for Energy and Environmental Chemistry Jena (CEEC Jena), Friedrich Schiller University Jena, Philosophenweg 7a, 07743 Jena, Germany

\* Correspondence: ulrich.schubert@uni-jena.de

**Keywords:** caffeine; NHC; palladium; catalysis

## Table of contents:

- NMR spectra

pp 2 – 6

|                                                                                                                   |    |
|-------------------------------------------------------------------------------------------------------------------|----|
| Figure S 1: <sup>1</sup> H-NMR (300 MHz, CDCl <sub>3</sub> ) spectrum of biphenyl. ....                           | 3  |
| Figure S 2: <sup>1</sup> H-NMR (300 MHz, CDCl <sub>3</sub> ) spectrum of 4-methoxy-biphenyl. ....                 | 4  |
| Figure S 3: <sup>1</sup> H-NMR (300 MHz, CDCl <sub>3</sub> ) spectrum of 4-nitro-biphenyl. ....                   | 4  |
| Figure S 4: <sup>1</sup> H-NMR (300 MHz, CDCl <sub>3</sub> ) spectrum of methyl cinnamate. ....                   | 5  |
| Figure S 5: <sup>1</sup> H-NMR (300 MHz, CDCl <sub>3</sub> ) spectrum of methyl 4-methoxycinnamate. ....          | 5  |
| Figure S 6: <sup>1</sup> H-NMR (300 MHz, CDCl <sub>3</sub> ) spectrum of methyl 4-nitrocinnamate. ....            | 6  |
| Figure S 7: <sup>1</sup> H-NMR (300 MHz, CDCl <sub>3</sub> ) spectrum of diphenylethylene. ....                   | 6  |
| Figure S 8: <sup>1</sup> H-NMR (300 MHz, CDCl <sub>3</sub> ) spectrum of 1-methoxy-4-(phenylethynyl)benzene. .... | 7  |
| Figure S 9: <sup>1</sup> H-NMR (300 MHz, CDCl <sub>3</sub> ) spectrum of 1-nitro-4-(phenylethynyl)benzene. ....   | 7  |
| Figure S 10: <sup>1</sup> H-NMR (300 MHz, CDCl <sub>3</sub> ) spectrum of ppm catalysis after 4 hours. ....       | 8  |
| Figure S 11: <sup>1</sup> H-NMR (300 MHz, CDCl <sub>3</sub> ) spectrum of ppm catalysis after 24 hours. ....      | 8  |
| Figure S 12: <sup>1</sup> H-NMR (300 MHz, CDCl <sub>3</sub> ) spectrum of ppm catalysis after 26 hours. ....      | 9  |
| Figure S 13: <sup>1</sup> H-NMR (300 MHz, CDCl <sub>3</sub> ) spectrum of ppm catalysis after 28 hours. ....      | 9  |
| Figure S 14: <sup>1</sup> H-NMR (300 MHz, CDCl <sub>3</sub> ) spectrum of ppm catalysis after 30 hours. ....      | 10 |

## Experimental data

### Synthesis of biphenyl:

The coupling of iodobenzene (35 mg) and phenyl boronic acid (60 mg) afforded a colorless solid (25 mg, 94%).

$^1\text{H-NMR}$  ( $\text{CDCl}_3$ ):  $\delta$  = 7.62 (m, 2H), 7.47 (m, 2H), 7.37 (m, 1H) ppm.

### Synthesis of 4-methoxy-biphenyl:

The cross-coupling of 4-iodoanisole (32 mg) and phenyl boronic acid (60 mg) afforded a colorless solid (24 mg, 96%).

$^1\text{H-NMR}$  ( $\text{CDCl}_3$ ):  $\delta$  = 7.57 (m, 2H), 7.54 (AB, 2H,  $^2J$  = 8.85 Hz), 7.44 (m, 2H), 7.33 (m, 1H), 7.02 (BA, 2H,  $^2J$  = 8.85 Hz), 3.87 (s, 3H) ppm.

### Synthesis of 4-nitro-biphenyl:

The cross-coupling of 4-iodonitrobenzene (38 mg) and phenyl boronic acid (60 mg) afforded a yellow solid (29 mg, 97%).

$^1\text{H-NMR}$  ( $\text{CDCl}_3$ ):  $\delta$  = 7.57 (m, 2H), 7.54 (AB, 2H,  $^2J$  = 8.85 Hz), 7.44 (m, 2H), 7.33 (m, 1H), 7.02 (BA, 2H,  $^2J$  = 8.85 Hz), 3.87 (s, 3H) ppm.

### Synthesis of methyl cinnamate:

The cross-coupling of iodobenzene (35 mg) and methyl acrylate (60 mg) afforded a yellow solid (26 mg, 97%).

$^1\text{H-NMR}$  ( $\text{CDCl}_3$ ):  $\delta$  = 7.33 (d, 1H,  $^2J$  = 16 Hz), 7.18 (m, 2H), 7.03 (m, 3H), 6.11 (d, 1H,  $^2J$  = 16 Hz), 3.43 (s, 3H) ppm.

### Synthesis of methyl 4-methoxycinnamate:

The cross-coupling of 4-iodoanisole (32 mg) and methyl acrylate (60 mg) afforded a colorless solid (27 mg, 98%).

$^1\text{H-NMR}$  ( $\text{CDCl}_3$ ):  $\delta$  = 7.69 (d, 1H,  $^2J$  = 16 Hz), 7.50 (AB, 2H,  $^2J$  = 8.66 Hz), 6.93 (BA, 2H,  $^2J$  = 8.66 Hz), 6.34 (d, 1H,  $^2J$  = 16 Hz), 3.84 (s, 3H), 3.80 (s, 3H) ppm.

### Synthesis of methyl 4-nitrocinnamate:

The cross-coupling of 4-iodonitrobenzene (38 mg) and methyl acrylate (60 mg) afforded a colorless solid (27 mg, 96%).

$^1\text{H-NMR}$  ( $\text{CDCl}_3$ ):  $\delta$  = 8.27 (AB, 2H,  $^2J$  = 8.75 Hz), 7.75 (d, 1H,  $^2J$  = 16 Hz), 7.69 (BA, 2H,  $^2J$  = 8.75 Hz), 6.59 (d, 1H,  $^2J$  = 16 Hz), 3.84 (s, 3H) ppm.

#### Synthesis of diphenylethylene:

The cross-coupling of iodobenzene (35 mg) and phenylacetylene (60 mg) afforded a colorless solid (29 mg, 97%).

$^1\text{H-NMR}$  ( $\text{CDCl}_3$ ):  $\delta = 7.55$  (m, 2H), 7.36 (m, 3H) ppm.

#### Synthesis of 1-methoxy-4-(phenylethynyl)benzene:

The cross-coupling of 4-iodoanisole (32 mg) and phenylacetylene (60 mg) afforded a colorless solid (27 mg, 96%).

$^1\text{H-NMR}$  ( $\text{CDCl}_3$ ):  $\delta = 7.51$  (m, 2H) 7.49 (AB, 2H,  $^2J = 8.94$  Hz), 7.34 (m, 4H), 6.90 (BA, 2H,  $^2J = 8.94$  Hz), 3.84 (s, 3H), ppm.

#### Synthesis of 1-nitro-4-(phenylethynyl)benzene:

The cross-coupling of 4-iodonitrobenzene (38 mg) and phenylacetylene (60 mg) afforded a yellow solid (33 mg, 98%).

$^1\text{H-NMR}$  ( $\text{CDCl}_3$ ):  $\delta = 8.25$  (AB, 2H,  $^2J = 8.94$  Hz), 7.69 (BA, 2H,  $^2J = 8.94$  Hz), 7.55 (m, 2H), 7.40 (m, 1H) ppm.

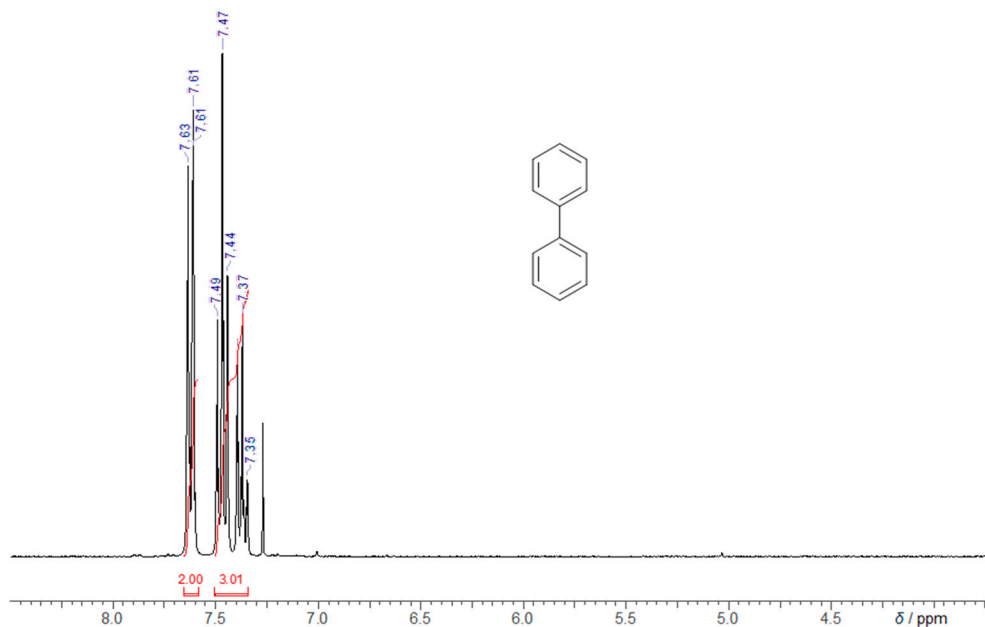

Figure S 1:  $^1\text{H-NMR}$  (300 MHz,  $\text{CDCl}_3$ ) spectrum of biphenyl.

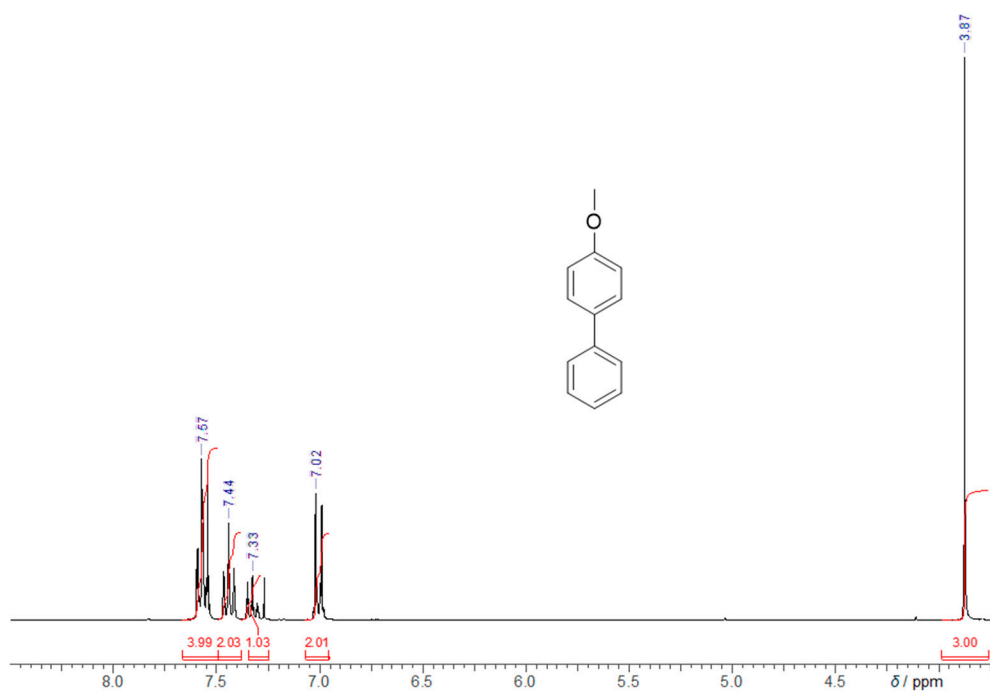

Figure S 2:  $^1\text{H}$ -NMR (300 MHz,  $\text{CDCl}_3$ ) spectrum of 4-methoxy-biphenyl.

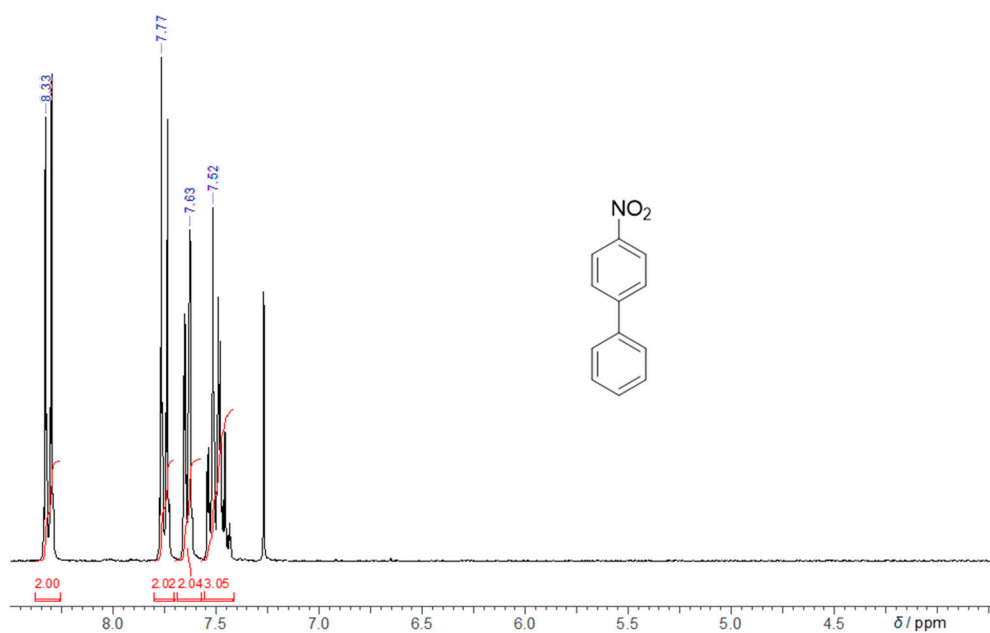

Figure S 3:  $^1\text{H}$ -NMR (300 MHz,  $\text{CDCl}_3$ ) spectrum of 4-nitro-biphenyl.

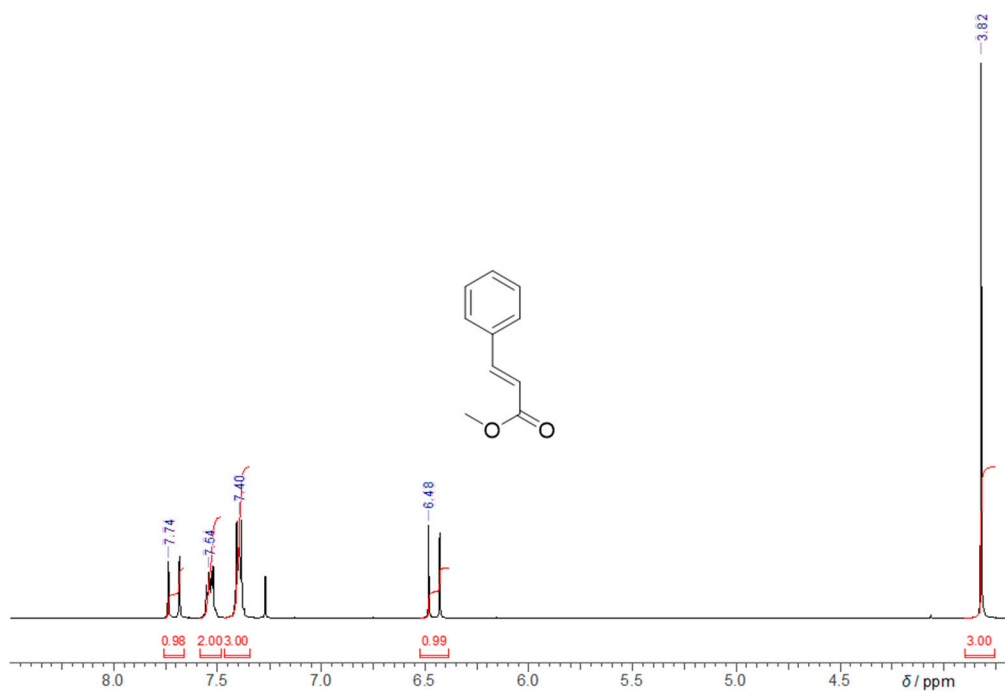

Figure S 4:  $^1\text{H}$ -NMR (300 MHz,  $\text{CDCl}_3$ ) spectrum of methyl cinnamate.

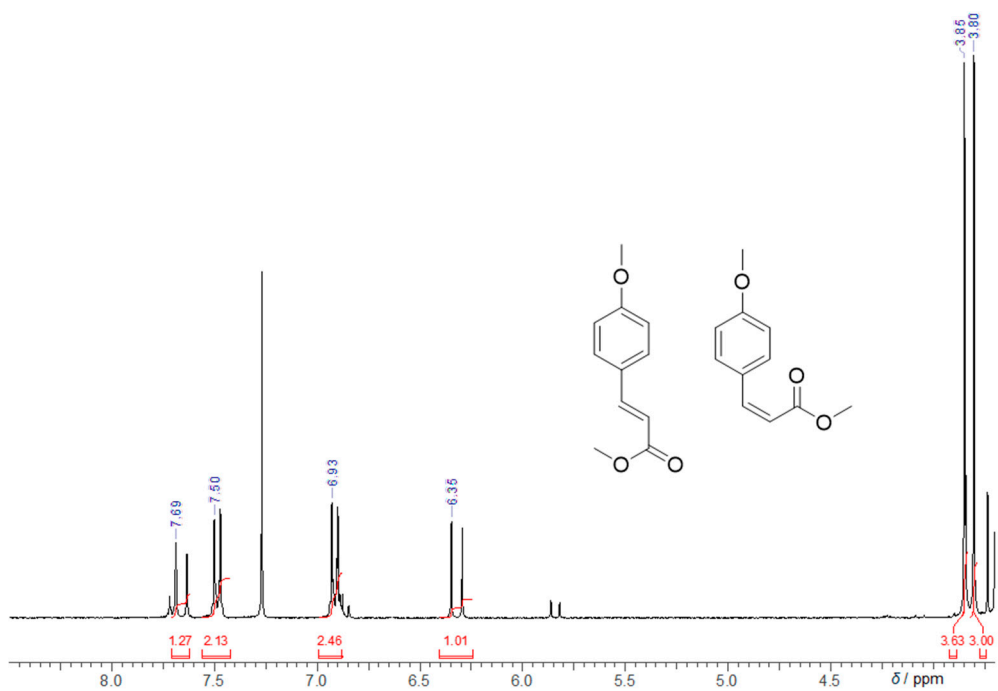

Figure S 5:  $^1\text{H}$ -NMR (300 MHz,  $\text{CDCl}_3$ ) spectrum of methyl 4-methoxycinnamate.

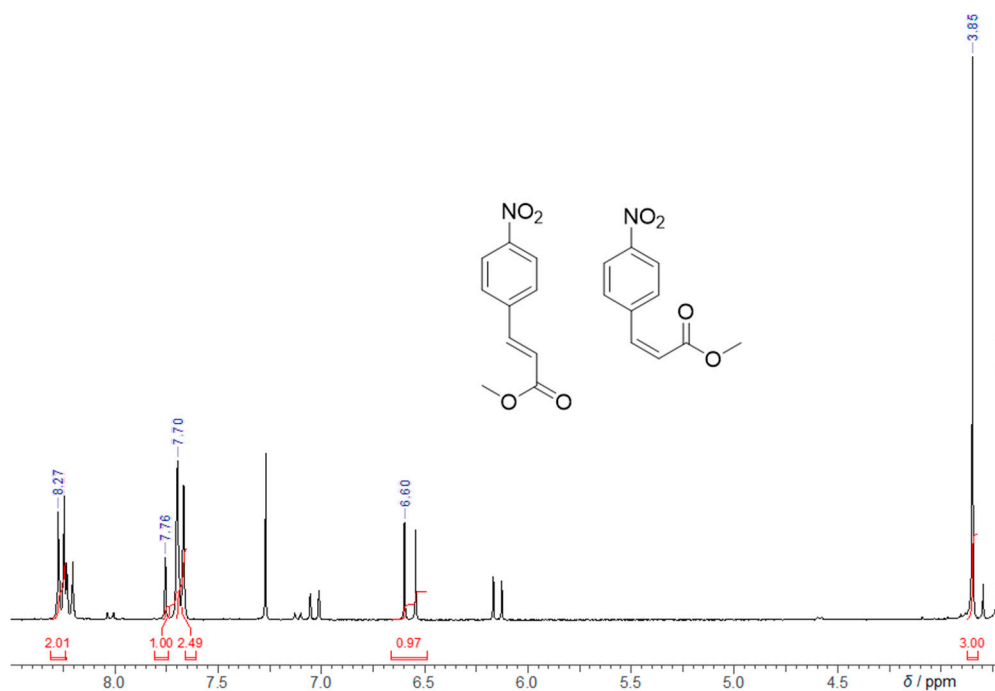

Figure S 6:  $^1\text{H}$ -NMR (300 MHz,  $\text{CDCl}_3$ ) spectrum of methyl 4-nitrocinnamate.

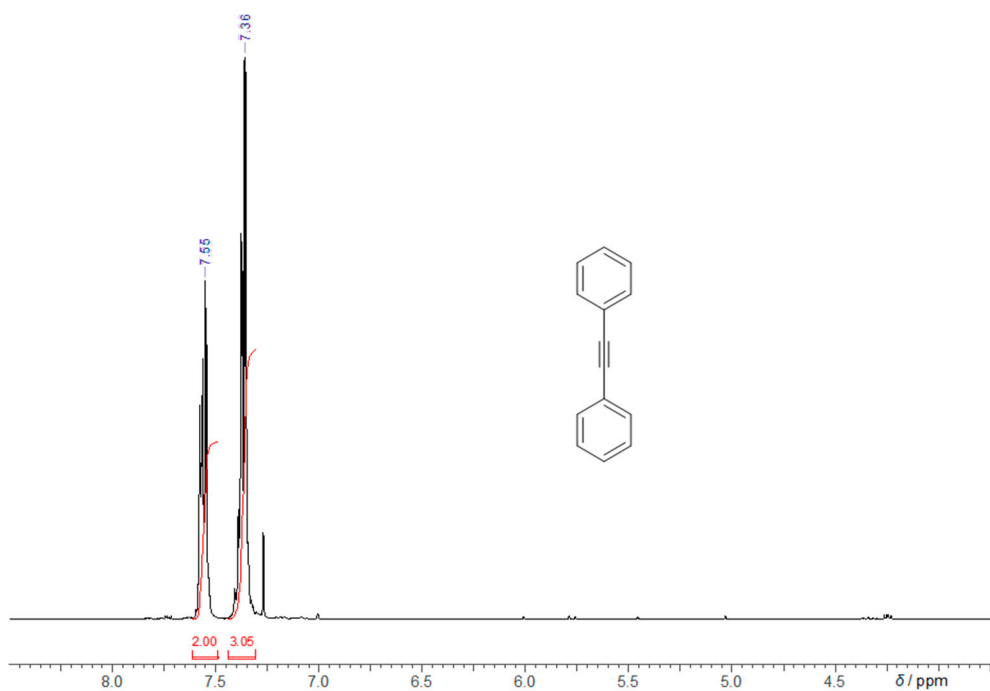

Figure S 7:  $^1\text{H}$ -NMR (300 MHz,  $\text{CDCl}_3$ ) spectrum of diphenylethyne.

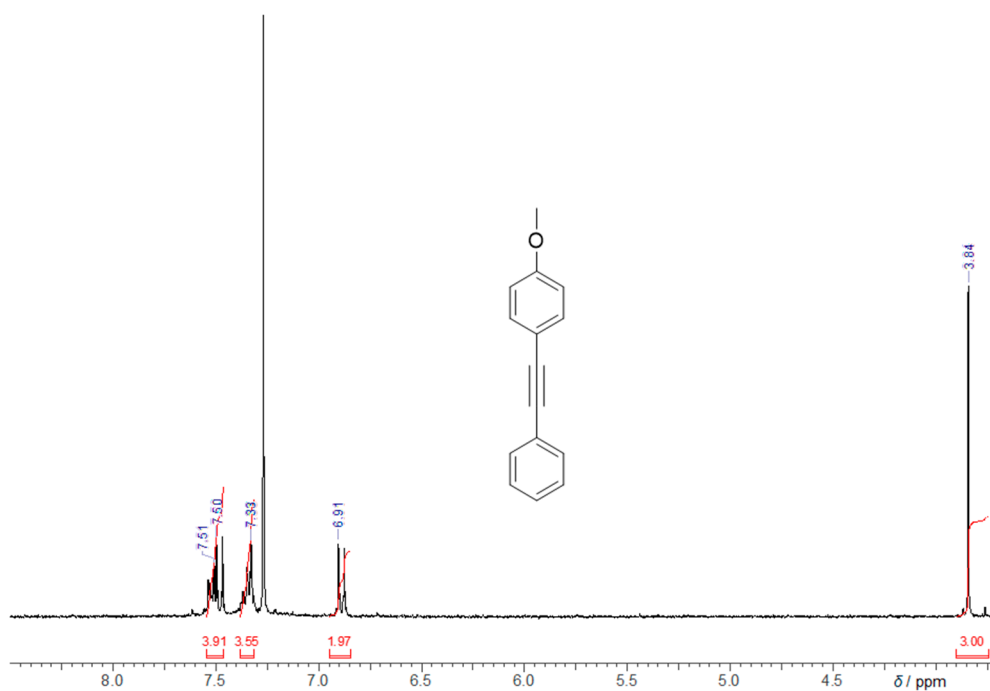

Figure S 8:  $^1\text{H}$ -NMR (300 MHz,  $\text{CDCl}_3$ ) spectrum of 1-methoxy-4-(phenylethynyl)benzene.

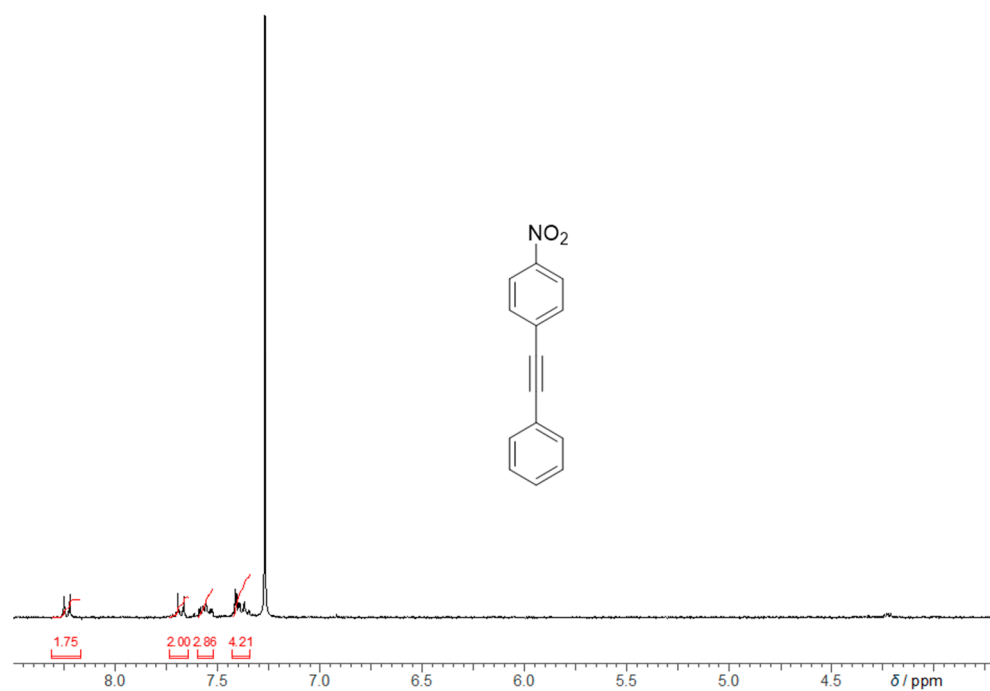

Figure S 9:  $^1\text{H}$ -NMR (300 MHz,  $\text{CDCl}_3$ ) spectrum of 1-nitro-4-(phenylethynyl)benzene.



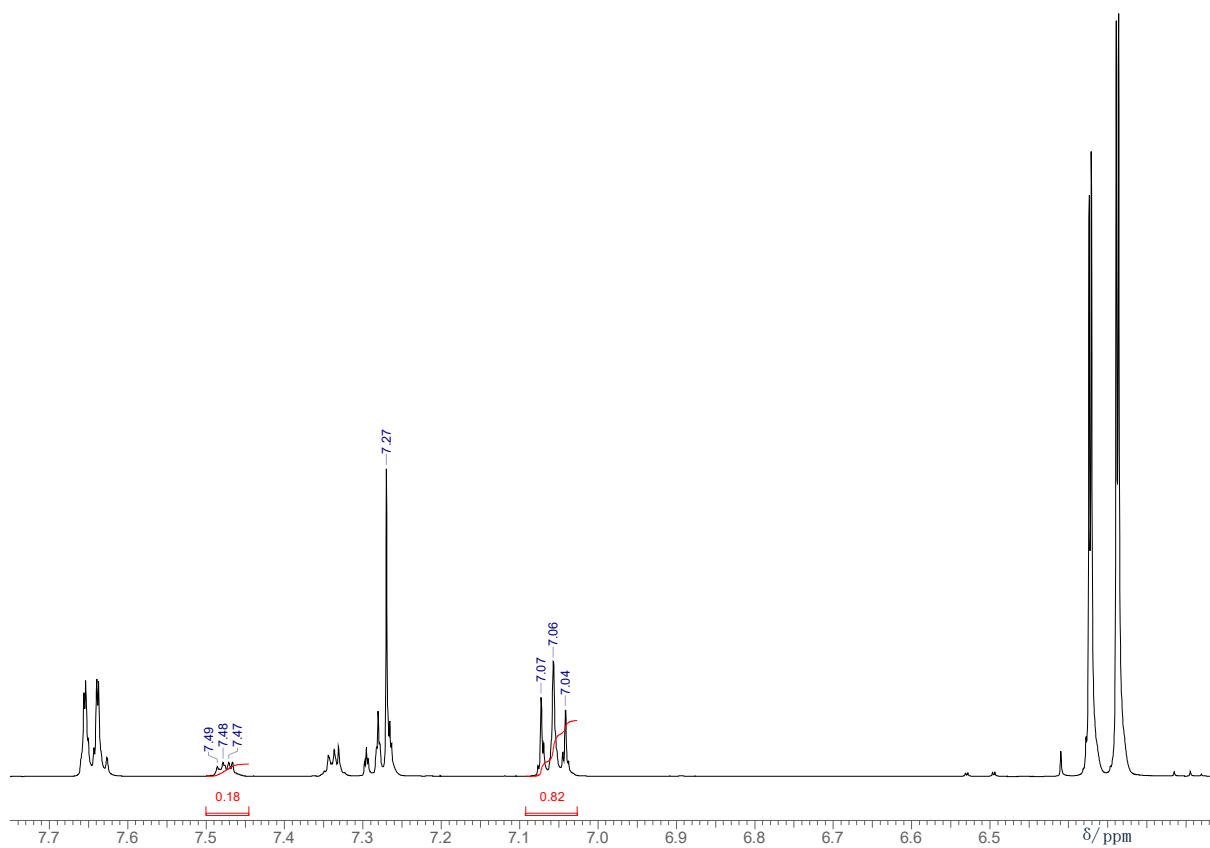

Figure S 10:  $^1\text{H}$ -NMR (300 MHz,  $\text{CDCl}_3$ ) spectrum of ppm catalysis after 4 hours.

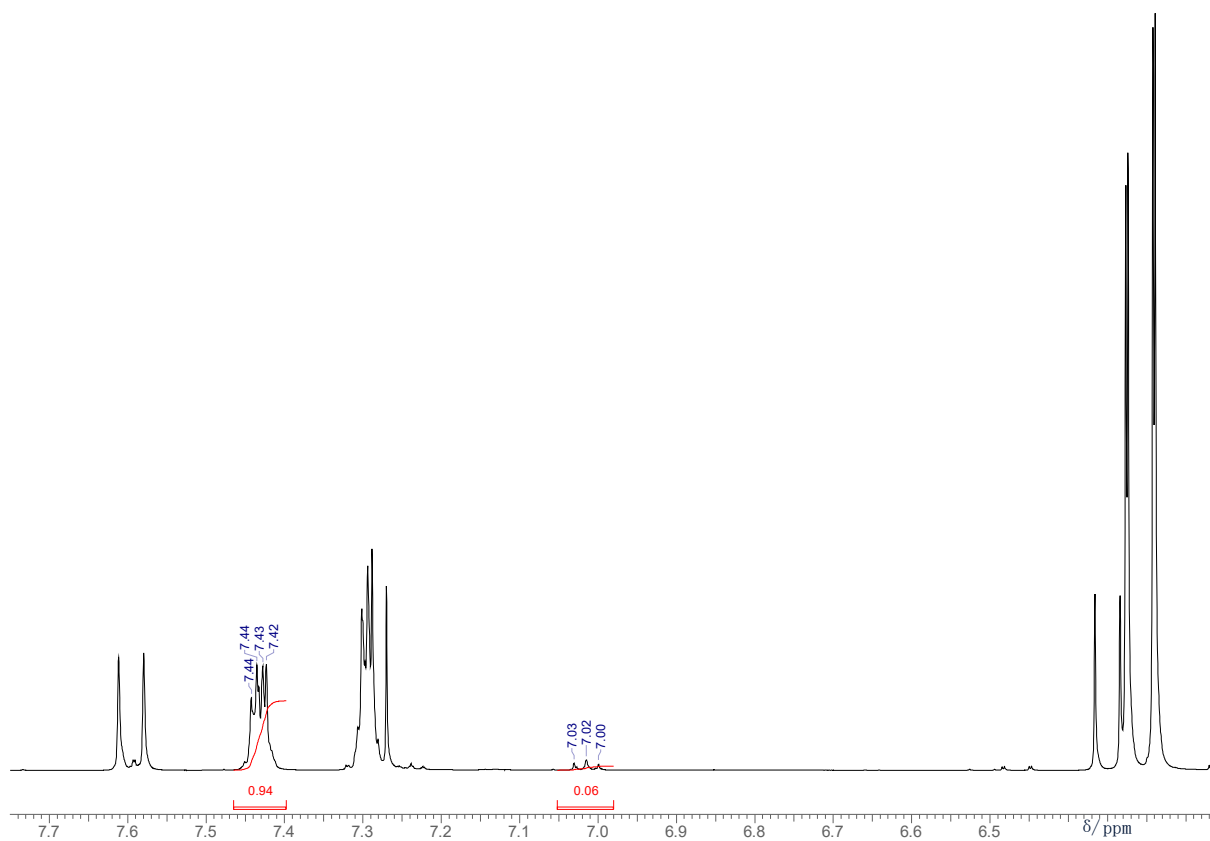

Figure S 11:  $^1\text{H}$ -NMR (300 MHz,  $\text{CDCl}_3$ ) spectrum of ppm catalysis after 24 hours.

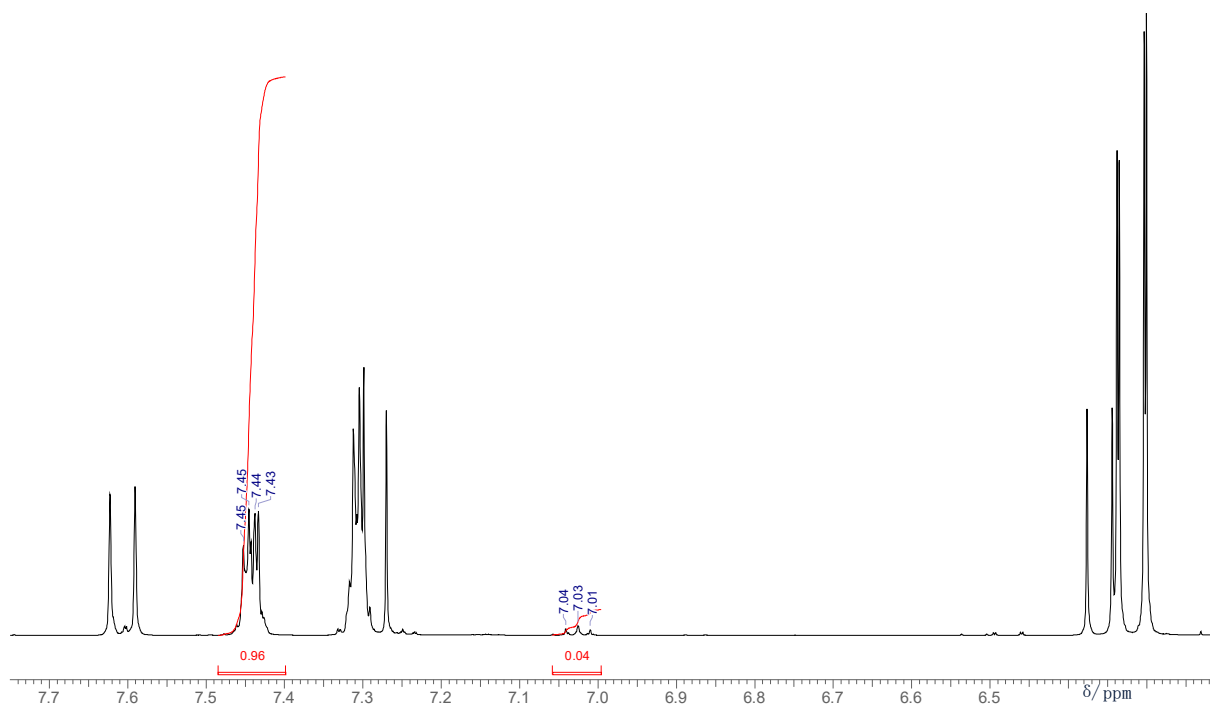

Figure S 12:  $^1\text{H}$ -NMR (300 MHz,  $\text{CDCl}_3$ ) spectrum of ppm catalysis after 26 hours.

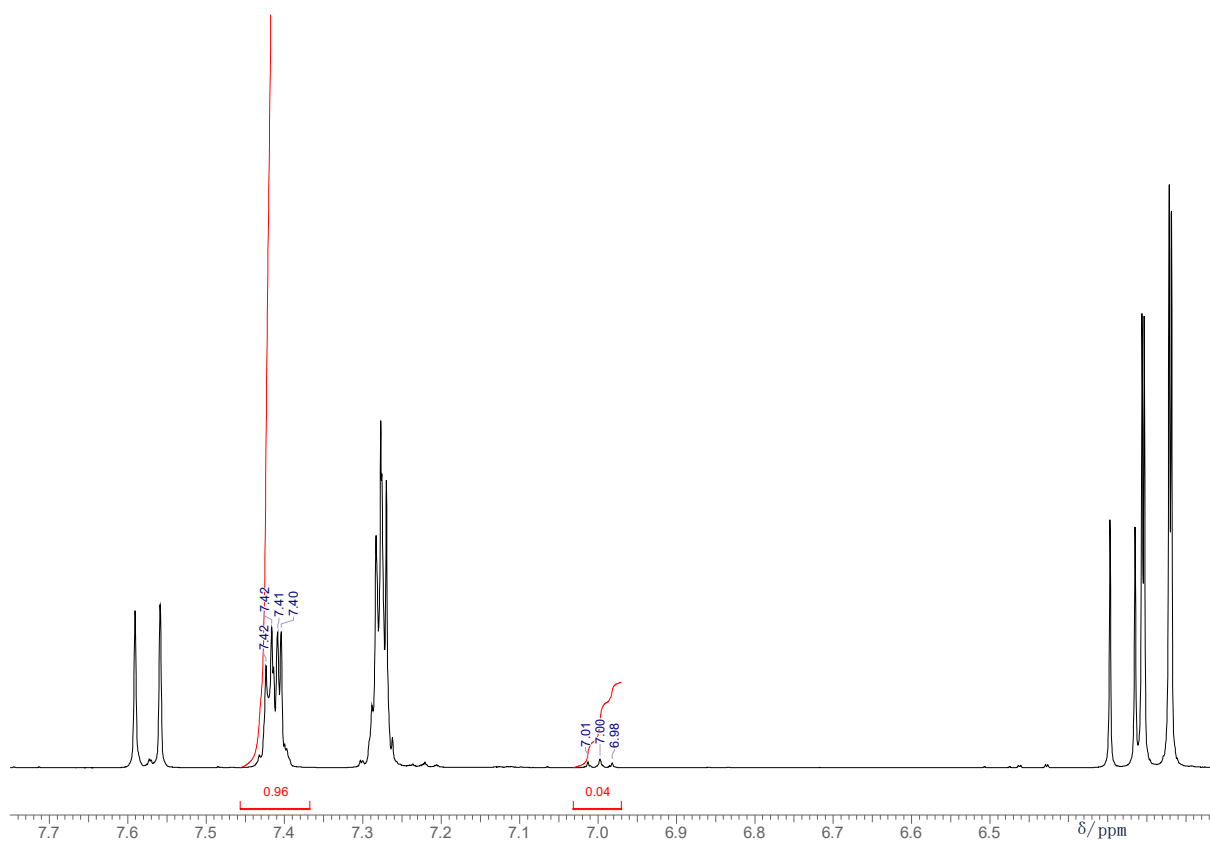

Figure S 13:  $^1\text{H}$ -NMR (300 MHz,  $\text{CDCl}_3$ ) spectrum of ppm catalysis after 28 hours.

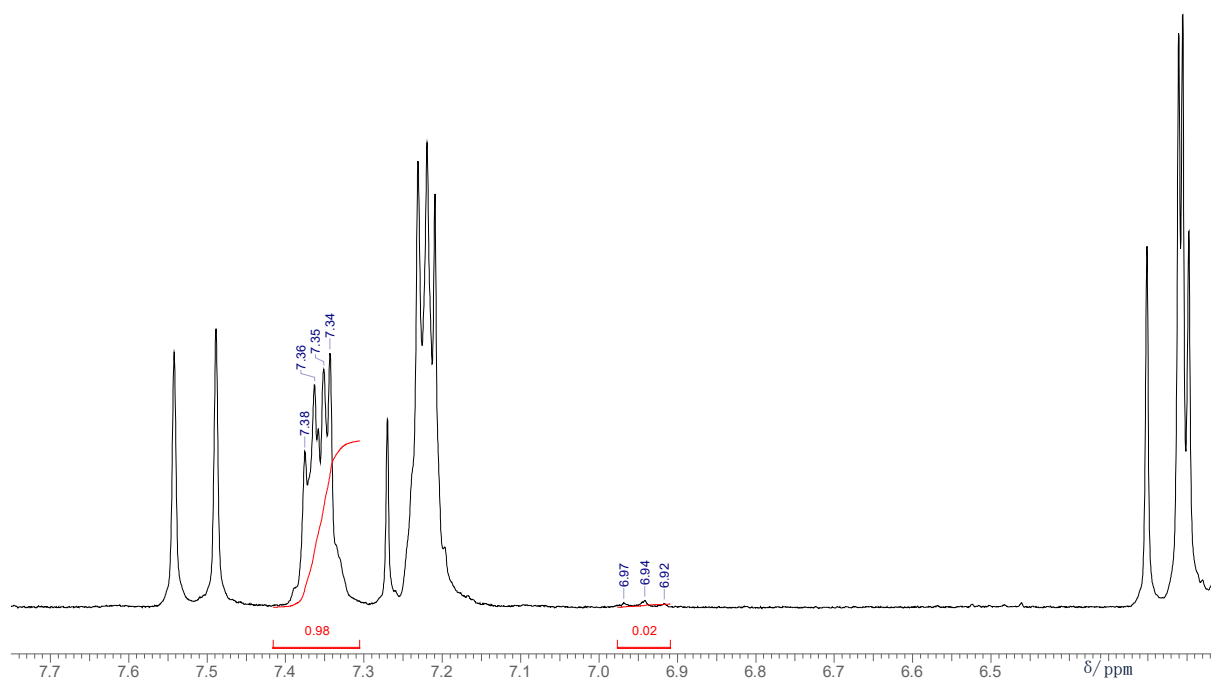

Figure S 14:  $^1\text{H}$ -NMR (300 MHz,  $\text{CDCl}_3$ ) spectrum of ppm catalysis after 30 hours.
